# Supplementary material for: LINE1 modulate human T cell function by regulating protein synthesis during the life span
Source: PubMed Central journal article supplement — Sci Adv. 2024 Oct 9;10(41):eado2134. doi: 10.1126/sciadv.ado2134 (PMC11463280; doi:10.1126/sciadv.ado2134), 2024-10-09
Supplement: sciadv.ado2134_sm.pdf [file sciadv.ado2134_sm.pdf]

Supplementary Materials for

**LINE1 modulate human T cell function by regulating protein synthesis during the life span**

Filippo V. Burattin *et al.*

Corresponding author: Beatrice Bodega, [bodega@ingm.org](mailto:bodega@ingm.org); Federica Marasca, [marasca@ingm.org](mailto:marasca@ingm.org)

*Sci. Adv.* **10**, eado2134 (2024)  
DOI: 10.1126/sciadv.ado2134

**The PDF file includes:**

Figs. S1 to S6  
Legends for tables S1 to S6

**Other Supplementary Material for this manuscript includes the following:**

Tables S1 to S6

**Supplementary figures and figure legends**

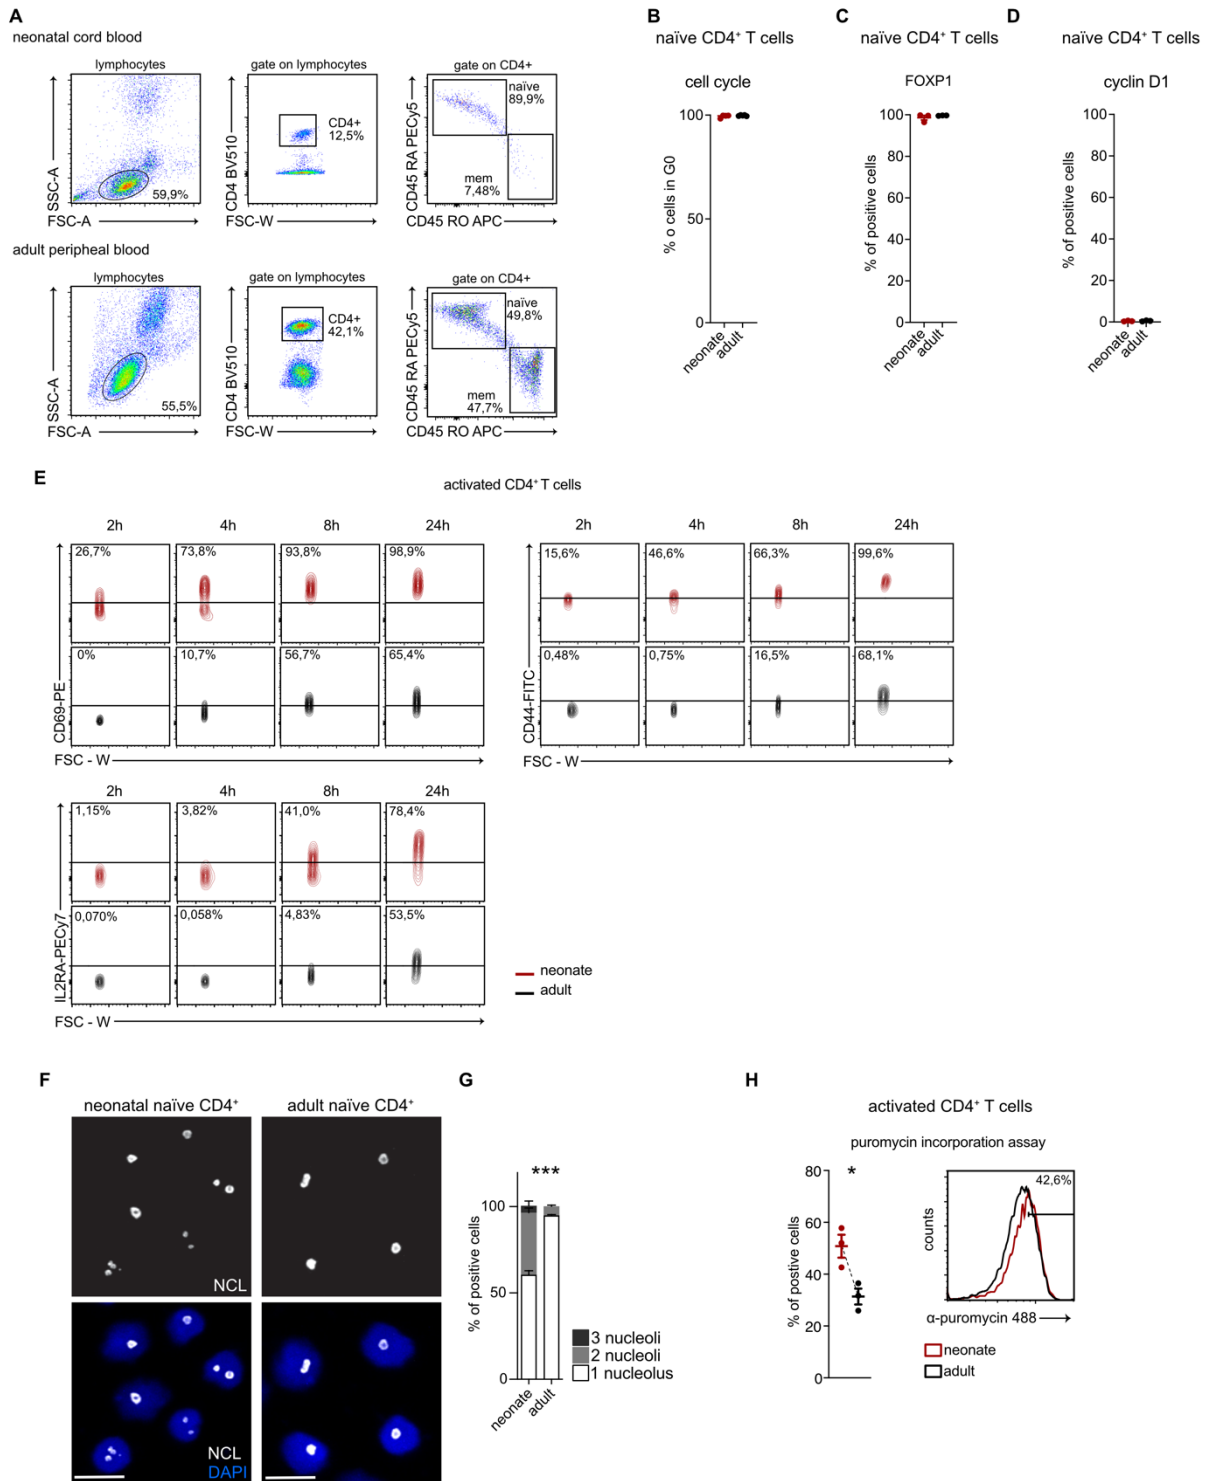

**Fig. S1. Neonatal naïve CD4<sup>+</sup> T cells display a distinctive quiescent phenotype primed for activation.**

(A) Representative sorting strategy of naïve CD4<sup>+</sup> T cells derived from umbilical cord blood (up) and adult peripheral blood (bottom). (B) Percentage of Ki-67 positive neonatal or adult naïve CD4<sup>+</sup> T cells (*n* = 4). (C) Percentage of FOXP1 positive neonatal or adult naïve CD4<sup>+</sup> T cells (*n* = 3). (D) Percentage of CyclinD1

Burattin, Vadalà et al.,

positive neonatal or adult naïve CD4<sup>+</sup> T cells ( $n = 3$ ). **(E)** Representative counter plot of CD69, CD44, IL2RA positive naïve CD4<sup>+</sup> T cells isolated from neonates or adults and activated for 2, 4, 8 or 24 h. **(F)** Confocal fluorescence microscopy images of Nucleolin immunofluorescence staining (grey) in naïve CD4<sup>+</sup> T cells isolated from neonates or adults. Original magnification 63x, scale bar 5 $\mu$ m. **(G)** Quantification of nucleoli number displayed by neonatal or adult naïve CD4<sup>+</sup> T cells ( $n = 3$ ). \*\*\*  $P < 0.001$ ,  $F=322.1$ , Two-way ANOVA. **(H)** Percentage of puromycin-positive neonatal or adult naïve CD4<sup>+</sup> T cells activated for 24 h ( $n = 3$ ). \*  $P = 0.0226$ , unpaired Two-tailed  $t$ -test. All data represent mean  $\pm$  s.e.m,  $n$  refers to individuals.

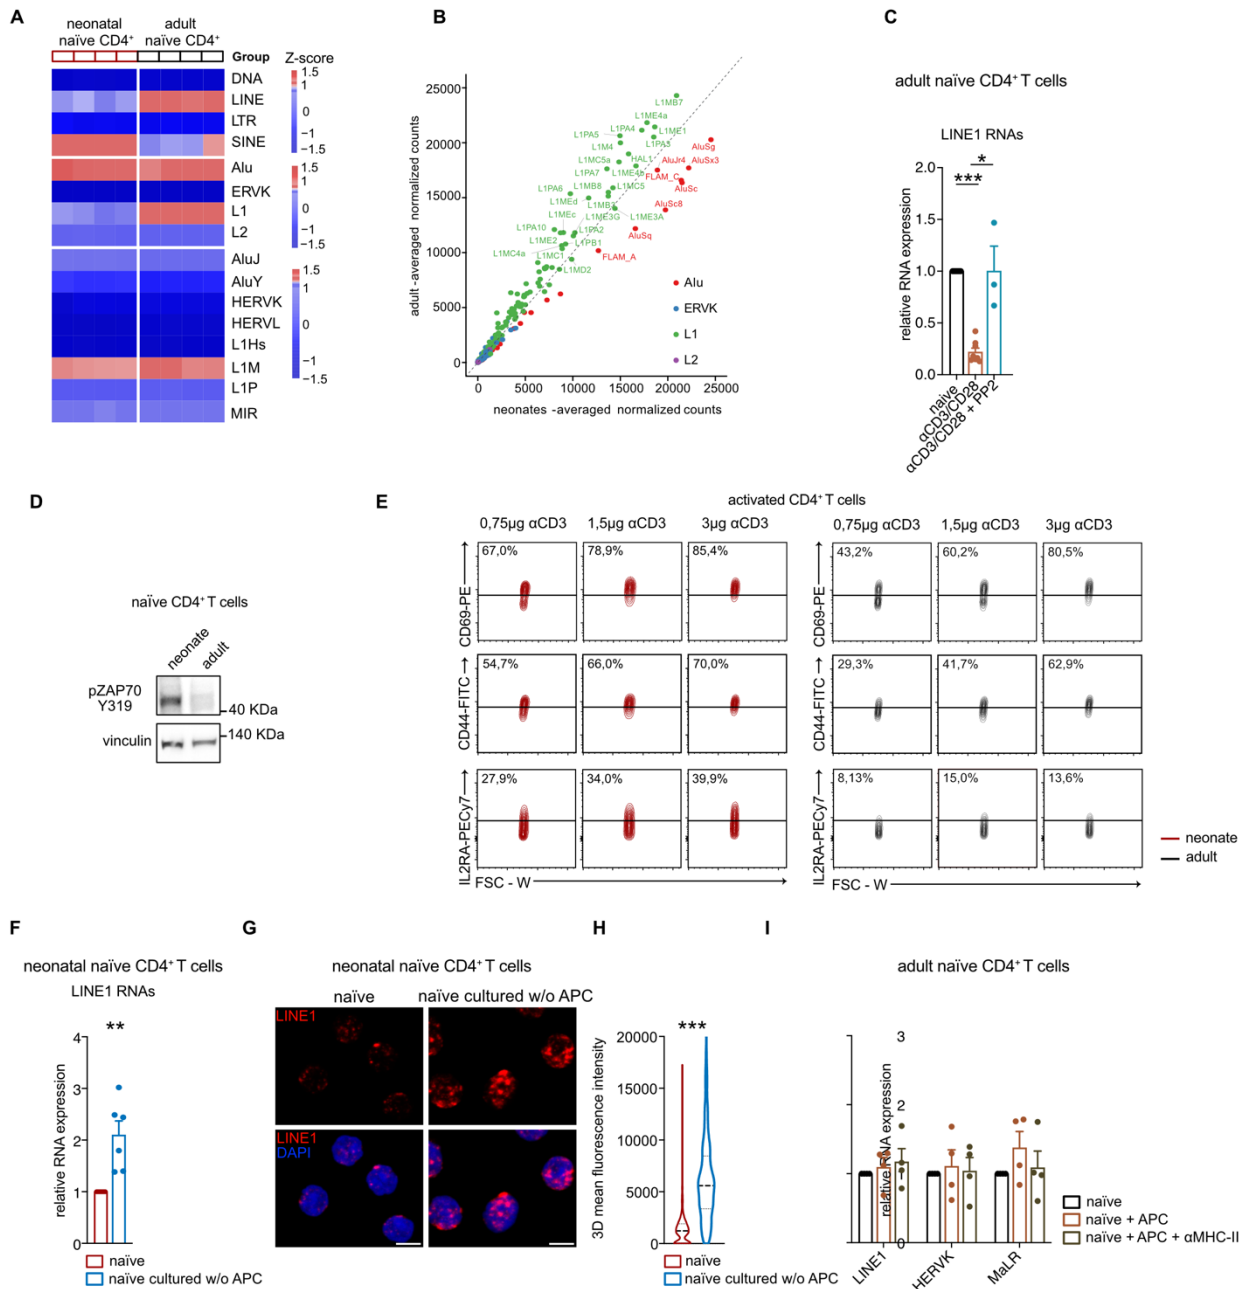

**Fig. S2. Tonic TCR stimulation regulates LINE1 expression in neonatal naïve CD4<sup>+</sup> T cells.**

(A) Heatmap of TE expression at class, family and subfamilies in neonatal or adult naïve CD4<sup>+</sup> T cell RNA-seq ( $n = 4$ ). Z-score was calculated on DESeq2 normalized TE counts (see methods). (B) Scatter plot of averaged DESeq2 normalized counts of TE subfamilies in neonatal or adult naïve CD4<sup>+</sup> T cell RNA-seq ( $n = 4$ ). (C) LINE1 expression by RT-qPCR in adult naïve CD4<sup>+</sup> T cells or naïve CD4<sup>+</sup> T cells activated for 8 h with anti-CD3/anti-CD28 beads with or without Lck inhibitor (PP2) (anti-CD3/anti-CD28  $n = 8$ ; anti-CD3/anti-CD28 + PP2  $n = 3$ ). \*\*\*  $P < 0.001$ ; \*  $P = 0.04$ , paired Two-tailed  $t$ -test. (D) Western blot analysis of phospho-ZAP70 (Tyr319) in neonatal or adult naïve CD4<sup>+</sup> T cells. Data were normalized on Vinculin. (E)

Burattin, Vadalà et al.,

Representative counter plot of CD69, CD44, IL2RA positive naïve CD4<sup>+</sup> T cells isolated from neonates or adults and activated for 16 h with different anti-CD3 concentrations. **(F)** LINE1 expression by RT-qPCR in neonatal naïve CD4<sup>+</sup> T cells either freshly isolated or cultured without APC ( $n = 6$ ). \*\*  $P = 0.010$ , paired Two-tailed  $t$ -test. **(G)** Confocal fluorescence microscopy images of LINE1 RNA FISH (red) in neonatal naïve CD4<sup>+</sup> T cells either freshly isolated or cultured without APC, original magnification 63x, scale bar 5 $\mu$ m and **(H)** relative quantification (at least 200 nuclei,  $n = 2$ ). \*\*\*  $P < 0.001$ , unpaired Two-tailed  $t$ -test. **(I)** LINE1, HERVK and MaLR expression by RT-qPCR in adult naïve CD4<sup>+</sup> T cells either freshly processed or cultured in complete medium with autologous APC, with or without  $\alpha$ -MHC-II ( $n = 4$ ). All data represent mean  $\pm$  s.e.m,  $n$  refers to individuals.

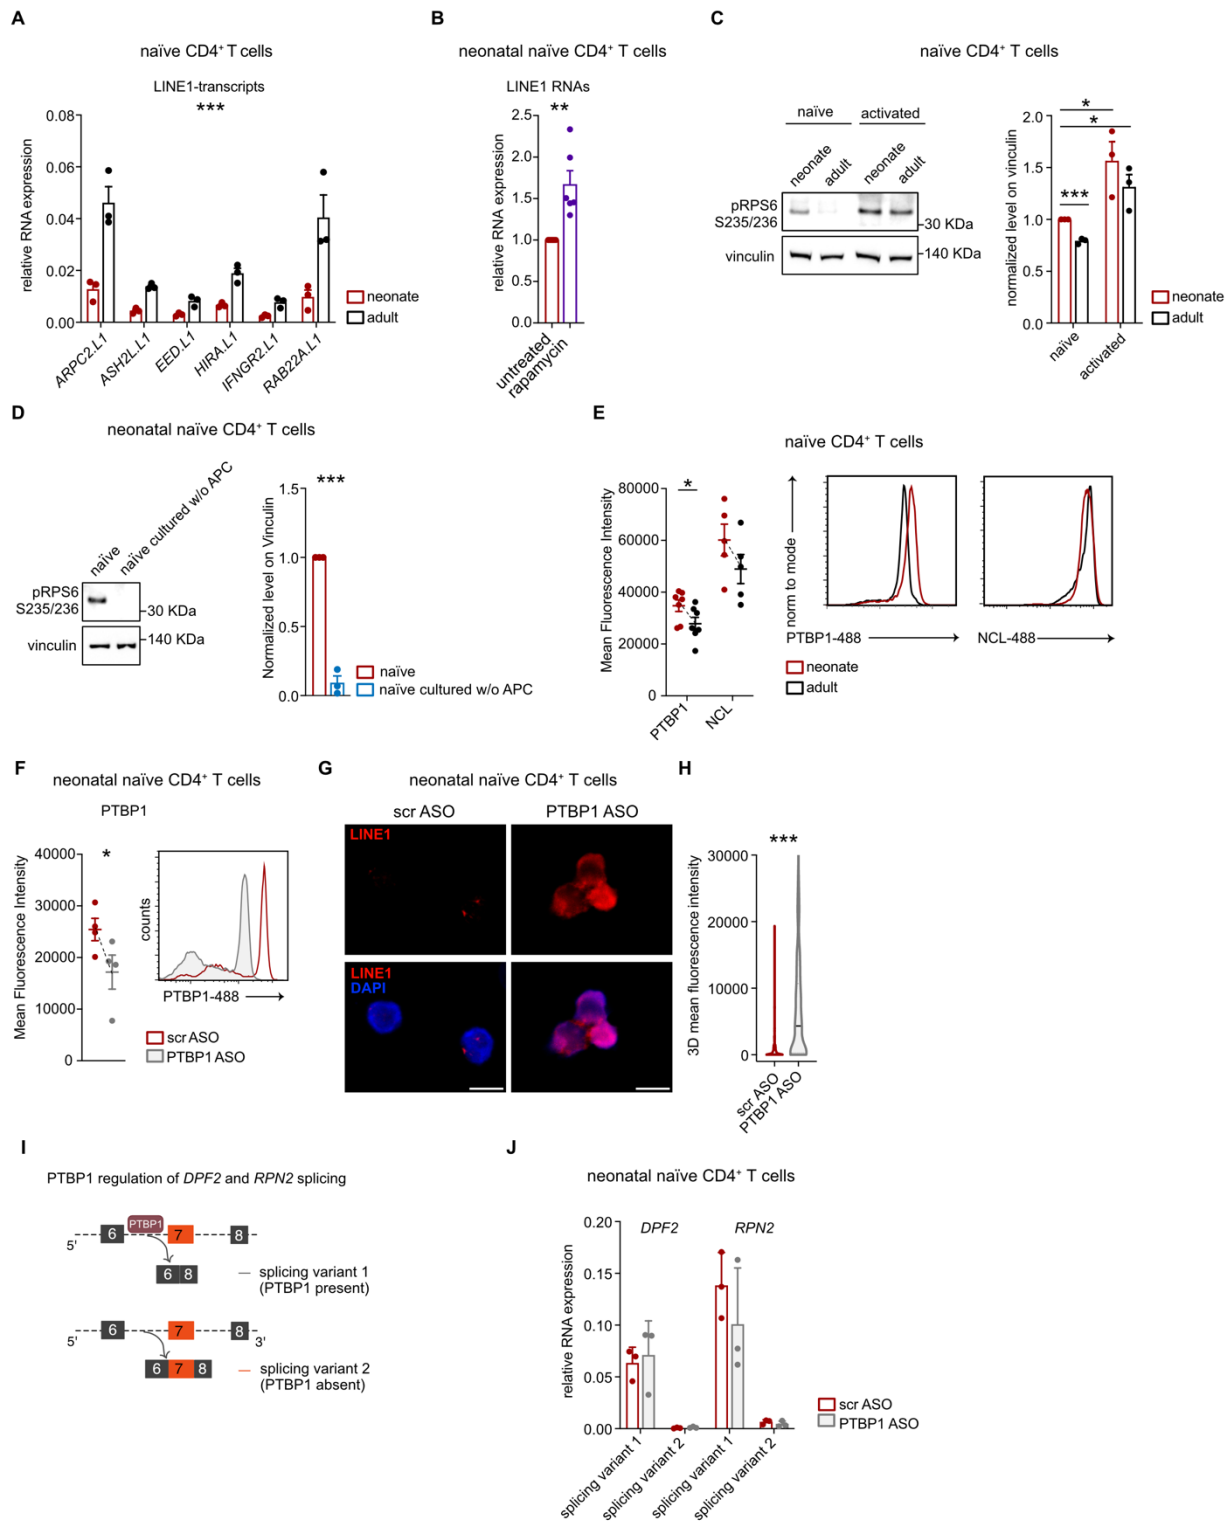

**Fig. S3. PTBP1 suppresses the splicing of intronic LINE1 sequences in neonatal naïve CD4<sup>+</sup> T cells.**

(A) LINE1-transcripts expression by RT-qPCR in neonatal or adult naïve CD4<sup>+</sup> T cells ( $n = 3$ ). \*\*\*  $P < 0.001$ ,  $F = 54.4$ , Two-way ANOVA. (B) LINE1 expression by RT-qPCR in neonatal naïve CD4<sup>+</sup> T cells treated with or without rapamycin ( $n = 6$ ). \*\*  $P = 0.009$ , paired Two-tailed  $t$ -test. (C) Western blot analysis and quantification of phospho-RPS6 (Ser235/236) in neonatal or adult naïve CD4<sup>+</sup> T cells stimulated (10 min) or

Burattin, Vadalà et al.,

not with anti-CD3-anti-CD28 ( $n = 3$ ). Data were normalized on Vinculin. Naïve neonatal vs adult: \*\*\*  $P = 0.0002$ ; neonatal activated vs neonatal naïve: \*  $P = 0.039$ , unpaired Two-tailed  $t$ -test.; neonatal naïve vs adult activated: \*  $P = 0.0304$ , unpaired One-tailed  $t$ -test. **(D)** Western blot analysis and quantification of phosphor-RPS6 (Ser235/236) in neonatal naïve  $CD4^+$  T cells freshly isolated or cultured without APC ( $n = 3$ ). Data were normalized on vinculin. \*\*\*  $P < 0.001$ , unpaired Two-tailed  $t$ -test. **(E)** PTBP1 and NCL MFI in neonatal or adult naïve  $CD4^+$  T cells (PTBP1  $n = 7$ ; NCL  $n = 5$ ). \*  $P = 0.03$ , unpaired One-tailed  $t$ -test. **(F)** PTBP1 MFI in neonatal naïve  $CD4^+$  T cells treated with PTBP1 or scr ASOs ( $n = 4$ ). \*  $P = 0.034$ , paired Two-tailed  $t$ -test. **(G)** Confocal fluorescence microscopy images of LINE1 RNA FISH in neonatal naïve  $CD4^+$  T cells treated with PTBP1 or scr ASOs. Original magnification 63x, scale bar 5 $\mu$ m, and **(H)** relative quantification (at least 200 nuclei,  $n = 2$ ). \*\*\*  $P < 0.001$ , paired Two-tailed  $t$ -test. **(I)** Scheme of RT-qPCR for alternative splicing variants regulated by PTBP1 (23). **(J)** *DPF2* and *RPN2* alternative splicing variant expression by RT-qPCR in neonatal naïve  $CD4^+$  T cells treated with PTBP1 or scr ASOs ( $n = 3$ ). All data represent mean  $\pm$  s.e.m,  $n$  refers to individuals.

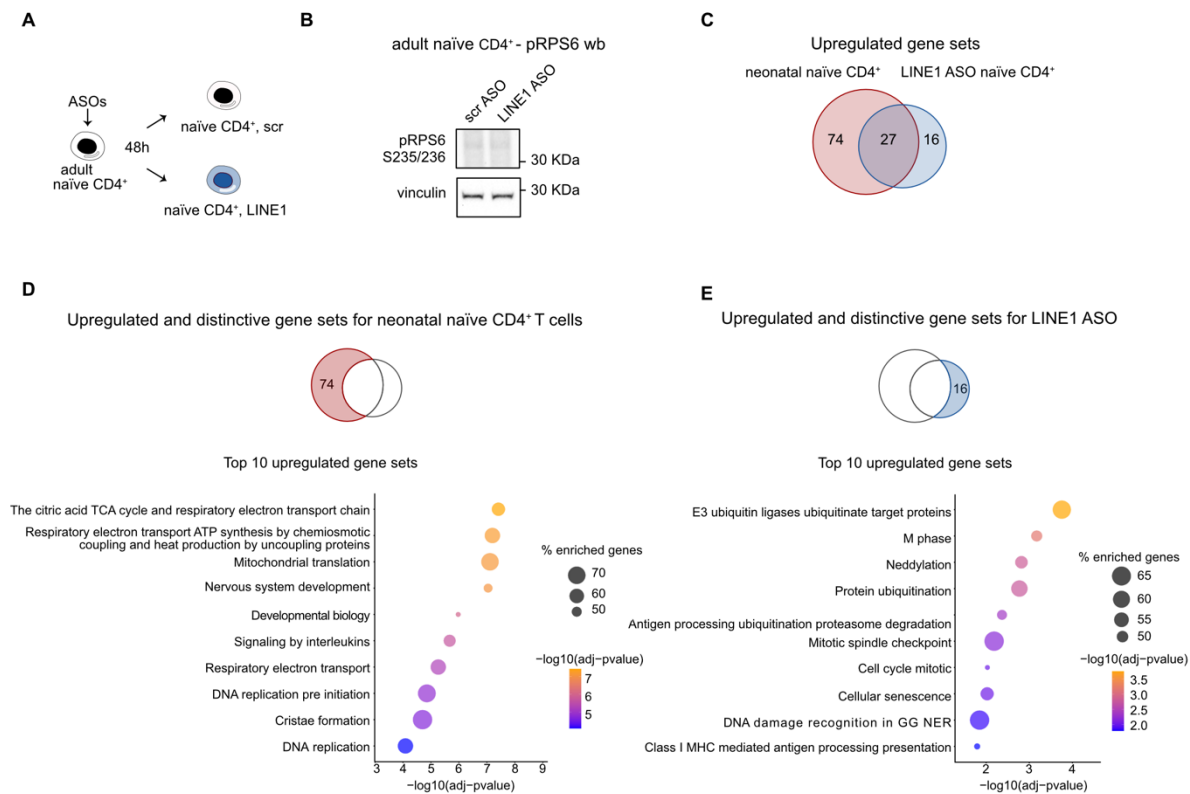

**Fig. S4. Gene sets related to protein translation and cell cycle progression are distinctively upregulated in neonatal naïve CD4<sup>+</sup> T or in adult naïve CD4<sup>+</sup> T cells depleted of LINE1.**

(A) Schematic representation of the strategy for LINE1 knockdown in adult naïve CD4<sup>+</sup> T cells with ASOs. (B) Western blot analysis of phospho-RPS6 (Ser235/236) in adult naïve CD4<sup>+</sup> T cells treated with LINE1 or scr ASOs ( $n = 2$ ). Data were normalized on Vinculin. (C) Venn diagram showing the intersection between the gene sets upregulated in the comparison neonatal vs adult naïve CD4<sup>+</sup> T cells and those upregulated in the comparison adult naïve CD4<sup>+</sup> T cells LINE1 vs scr ASOs. (D) GSEA of neonatal vs adult naïve CD4<sup>+</sup> T cells ( $n = 4$ ). Bubble plot showing the top 10 enriched gene sets among the 74 gene sets that are upregulated and specific for neonates from “Curated Reactome” database (MSigDb),  $P$  adjusted  $\leq 0.05$ . (E) GSEA of adult naïve CD4<sup>+</sup> T cells treated with LINE1 vs scr ASOs ( $n = 4$ ). Bubble plot showing the top 10 enriched gene sets among the 16 gene sets that are upregulated and specific for LINE1 ASOs condition from “Curated Reactome” database,  $P$  adjusted  $\leq 0.05$ .



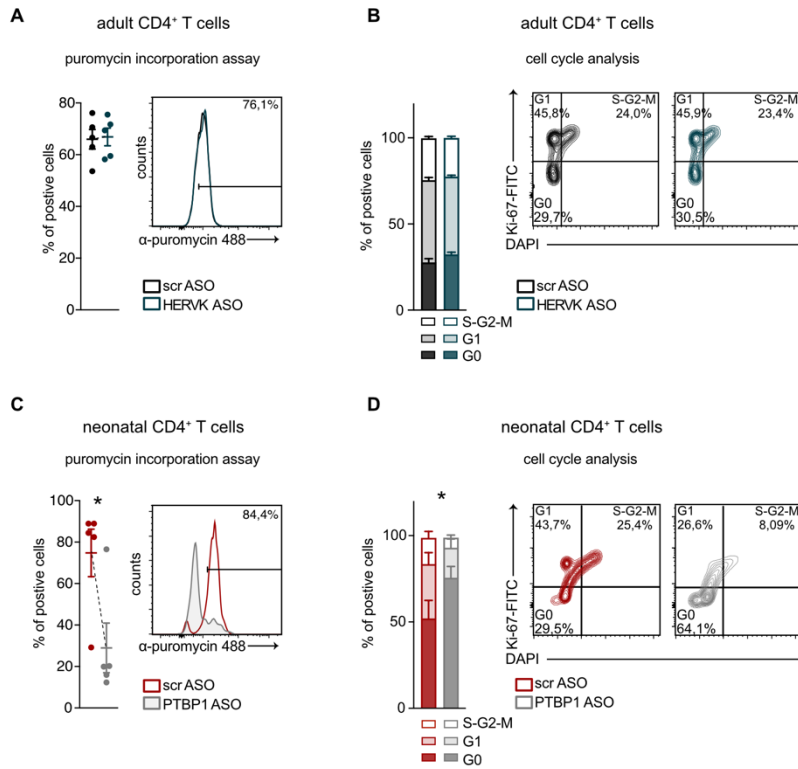

**Fig. S5. LINE1 expression controls protein synthesis and cell cycle progression.**

(A) Percentage of puromycin-positive adult naïve CD4<sup>+</sup> T cells treated with HERVK or scr ASOs and activated for 24 hours ( $n = 5$ ). (B) Cell-cycle analyses in adult CD4<sup>+</sup> T cells treated with HERVK or scr ASOs and activated for 36 hours ( $n = 5$ ). (C) Percentage of puromycin-positive neonatal naïve CD4<sup>+</sup> T cells treated with PTBP1 or scr ASOs and activated for 24 hours ( $n = 5$ ). \*  $P=0.04$ , paired Two-tailed  $t$ -test. (D) Cell-cycle analyses in neonatal CD4<sup>+</sup> T cells treated with PTBP1 or scr ASOs and activated for 36 hours ( $n = 5$ ). \*  $P = 0.0145$ ,  $F = 5.076$ , Two-way ANOVA. All data represent mean  $\pm$  s.e.m,  $n$  refers to individuals.

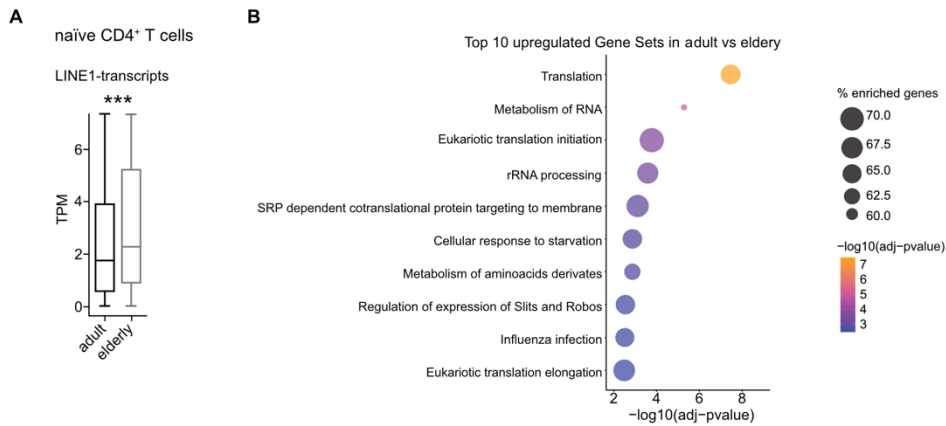

**Fig. S6. Elderly naïve CD4<sup>+</sup> T cells are characterized by increase in LINE1 expression and decrease in protein synthesis.**

(A) Expression levels of the 461 LINE1-transcripts identified in (15), using RNA-seq datasets from adult and elderly naïve CD4<sup>+</sup> T cells ( $n = 4$ ). \*\*\*  $P = 1.865e-11$ , unpaired Two-tailed Wilcoxon rank sum test. (B) GSEA of adult vs elderly naïve CD4<sup>+</sup> T cells ( $n = 4$ ). Bubble plot showing the top 10 enriched gene sets among the 17 gene sets that are upregulated and specific for adult condition from “Curated Reactome” database,  $P_{\text{adjusted}} \leq 0.05$ .

**Table S1.** LINE1-transcript expression quantified in quiescent neonatal and adult naïve CD4<sup>+</sup> T cells RNA-seq datasets.

**Table S2.** GSEA performed in i) neonatal versus adult naïve CD4<sup>+</sup> T cells ii) adult naïve CD4<sup>+</sup> T cells where LINE1 were downregulated using LINE1 ASOs versus control cells (scr ASOs) iii) common upregulated genesets from the two comparisons.

**Table S3.** Sample list of infants, toddlers, children, teenagers and elderly enrolled in the study.

**Table S4.** LINE1-transcript expression quantified in quiescent adult or elderly naïve CD4<sup>+</sup> T cells RNA-seq datasets.

**Table S5.** GSEA performed in i) adult vs elderly naïve CD4<sup>+</sup> T cells.

**Table S6.** List of primer sequences used in qRT-PCR analysis.
